# Supplementary material for: α7 Nicotinic acetylcholine receptor mediates right ventricular fibrosis and diastolic dysfunction in pulmonary hypertension
Source: JCI journal article supplement (doi:10.1172/jci.insight.142945), 2021-05-11
Supplement: sd1 [file 1]

**Table S1: Echocardiography parameters in the rat Sugen/Hypoxia pulmonary hypertension model at 3 and 7 wks.**

|                         | Control 3 wks<br>(n=9) | PH 3 wks<br>(n=11) | P-value | Control 7 wks<br>(n=6) | PH 7 wks<br>(n=5) | P-value |
|-------------------------|------------------------|--------------------|---------|------------------------|-------------------|---------|
| Cardiac output (mL/min) | 84±6.9                 | 58±4.9             | 0.0053  | 77±6.5                 | 51±11.9           | 0.07    |
| Heart rate (bpm)        | 357±7.9                | 373±10.9           | 0.27    | 350±17.3               | 309±4.5           | 0.06    |
| TAPSE (mm)              | 2.2±0.10               | 1.5±0.12           | 0.0008  | 2.9±0.27               | 2.1±0.12          | 0.02    |
| RV s'(mm/s)             | 46.3±2.9               | 35.7±2.3           | 0.01    | 56.8±5.1               | 42±3.3            | 0.04    |
| RV e' (mm/s)            | -33.8±2.9              | -22.6±2.3          | 0.008   | -41.3±2.9              | -16.2±2.3         | 0.0001  |
| RV E/A                  | 0.50±0.04              | 0.74±0.17          | 0.16    | 0.54±0.08              | 0.44±0.05         | 0.36    |
| LV EF (%)               | 80±1.8                 | 83±3.7             | 0.51    | 75±2.3                 | 85±3.3            | 0.03    |
| LV E/A                  | 1.3±0.15               | 1.1±0.07           | 0.15    | 1.3±0.11               | 1.1±0.14          | 0.28    |
| PAT (ms)                | 34.7±2.4               | 16.7±0.9           | <0.0001 | 28.8±1.4               | 17.4±1.5          | 0.0004  |
| RV wall thickness (mm)  | 0.5±0.06               | 1.4±0.09           | <0.0001 | 0.6±0.03               | 1.7±0.08          | <0.0001 |

All data presented as mean ± SEM. Unpaired t-test or Mann-Whitney test; Abbreviations: TAPSE= tricuspid annular plane systolic excursion; RV s'= doppler tissue imaging tricuspid lateral annular systolic velocity wave (s'); RV e'= lateral tricuspid annulus velocity during early filling (e'); EF= ejection fraction; E/A= early and late filling waves, indication of RV diastolic function; PAT = pulmonary acceleration time.

**Table S2: Characteristics of human subjects:**

| <b>Gender</b>   | <b>Disease</b> | <b>Age</b> | <b>Race</b> |
|-----------------|----------------|------------|-------------|
| <b>Controls</b> |                |            |             |
| Female          | Control        | 81         |             |
| Female          | Control        | 50         | Caucasian   |
| Male            | Control        | 49         | Black       |
| Female          | Control        | 76         | Caucasian   |
| <b>PAH</b>      |                |            |             |
| Male            | IPAH           | 61         |             |
| Female          | IPAH           | 47         |             |
| Male            | IPAH           | 27         | Caucasian   |
| Female          | IPAH           | 17         |             |
| Male            | IPAH           | 50         | Caucasian   |
| Female          | PAH            | 56         |             |

**Table S3: Echocardiography parameters before and after mecamlamine treatment (starting at week 3).**

|                         | PH-Veh Pre<br>(n=7) | PH-Veh Post<br>(n=7) | P-value | PH-Mec Pre<br>(n=9) | PH-Mec Post<br>(n=9) | P-value |
|-------------------------|---------------------|----------------------|---------|---------------------|----------------------|---------|
| Cardiac output (mL/min) | 68.3±5.8            | 67.7±3.9             | 0.88    | 60.5±3.8            | 71.4±5.9             | 0.12    |
| RV Stroke volume (mL)   | 0.18±0.01           | 0.19±0.01            | 0.19    | 0.16±0.01           | 0.20±0.01            | 0.02    |
| Heart rate (bpm)        | 388±5.0             | 358±8.5              | 0.02    | 379±6.5             | 351±6.0              | 0.0006  |
| TAPSE (mm)              | 1.9±0.13            | 1.7±0.06             | 0.17    | 1.8±0.11            | 1.8±0.14             | 0.89    |
| RV s'(mm/s)             | 31.1±2.5            | 30.4±3.1             | 0.82    | 34.1±2.6            | 35.5±2.7             | 0.79    |
| RV e' (mm/s)            | -17.6±5.4           | -19.5±3.2            | 0.96    | -13.3±1.2           | -21.0±2.3            | 0.04    |
| RV E/e'                 | -45.2±17.7          | -15.9±2.7            | 0.25    | -30.3±9.2           | -18.6±3.6            | 0.56    |
| RV E/A                  | 0.77±0.32           | 0.41±0.05            | 0.38    | 0.61±0.14           | 0.54±0.09            | 0.25    |
| LV EF (%)               | 79.4±3.1            | 76.4±2.5             | 0.35    | 74.02±3.1           | 76.1±3.1             | 0.34    |
| LV E/A                  | 0.71±0.23           | 0.98±0.06            | 0.31    | 0.79±0.20           | 1.3±0.12             | 0.03    |
| PAT (ms)                | 23.3±1.7            | 21.1±1.4             | 0.04    | 19.4±1.6            | 20.2±1.3             | 0.73    |
| RV wall thickness (mm)  | 1.3±0.10            | 1.4±0.13             | 0.32    | 1.3±0.11            | 1.1±0.11             | 0.01    |

All data are presented as mean ± SEM; Paired t-test or Wilcoxon; Abbreviations: MEC= mecamlamine; TAPSE= tricuspid annular plane systolic excursion; RV s'= doppler tissue imagining tricuspid lateral annular systolic velocity wave (s'); RV e'= lateral tricuspid annulus velocity during early filling (e'); E/A= early and late filling waves, indication of RV diastolic function; PAT = pulmonary acceleration time.

**Table S4: Echocardiography parameters before and after mecamlamine treatment (starting at week 5).**

|                         | PH-Veh Pre<br>(n=6) | PH-Veh Post<br>(n=6) | P-value | PH-Mec Pre<br>(n=10) | PH-Mec Post<br>(n=10) | P-value |
|-------------------------|---------------------|----------------------|---------|----------------------|-----------------------|---------|
| Cardiac output (mL/min) | 66.3±6.4            | 64.0±4.1             | 0.59    | 56.6±4.1             | 78.4±5.0              | 0.0001  |
| Stroke volume (mL)      | 0.19±0.02           | 0.18±0.01            | 0.74    | 0.16±0.01            | 0.22±0.01             | 0.0001  |
| Heart rate (bpm)        | 354±10.2            | 347±5.5              | 0.56    | 361±8.3              | 359±6.8               | 0.83    |
| TAPSE (mm)              | 2.1±0.17            | 2.0±0.18             | 0.78    | 2.1±0.17             | 2.2±0.19              | 0.52    |
| RV s'(mm/s)             | 35.7±2.4            | 32.4±2.4             | 0.55    | 36.1±1.6             | 34.8±1.8              | 0.52    |
| RV e' (mm/s)            | -21.5±1.9           | -27.0±5.7            | 0.57    | -21.7±2.0            | -28.1±3.9             | 0.08    |
| RV E/e'                 | -18.7±3.3           | -14.2±2.3            | 0.36    | -17.7±3.1            | -11.8±2.1             | 0.04    |
| RV E/A                  | 0.44±0.03           | 0.41±0.08            | 0.59    | 0.49±0.04            | 0.40±0.03             | 0.23    |
| LV EF (%)               | 75.8±2.0            | 77.5±2.9             | 0.47    | 81.5±2.7             | 80.4±1.2              | 0.70    |
| LV E/A                  | 1.1±0.05            | 1.1±0.12             | 0.89    | 1.3±0.14             | 1.1±0.11              | 0.16    |
| PAT (ms)                | 15.0±0.9            | 15.5±0.9             | 0.72    | 16.4±1.2             | 20.0±1.4              | 0.04    |
| RV wall thickness (mm)  | 1.4±0.18            | 1.3±0.09             | 0.22    | 1.2±0.11             | 1.0±0.10              | 0.01    |

All data are presented as mean ± SEM; Paired t-test or Wilcoxon; Abbreviations: MEC= mecamlamine; TAPSE= tricuspid annular plane systolic excursion; RV s'= doppler tissue imagining tricuspid lateral annular systolic velocity wave (s'); RV e'= lateral tricuspid annulus velocity during early filling (e'); E/A= early and late filling waves, indication of RV diastolic function; PAT = pulmonary acceleration time.

**Table S5: Echocardiography parameters in wild-type and  $\alpha 7$ nAChR knockout mice after pulmonary artery banding**

|                         | WT Sham<br>(n=18) | WT PAB<br>(n=26) | KO Sham<br>(n=9) | KO PAB<br>(n=19) | Interaction | P-value<br>WT Sham vs.<br>PAB | P-value<br>KO Sham vs.<br>PAB |
|-------------------------|-------------------|------------------|------------------|------------------|-------------|-------------------------------|-------------------------------|
| Cardiac output (mL/min) | 19.7±0.7          | 17.8±1.0         | 13.8±1.1         | 15.2±1.1         | 0.14        | 0.86                          | 0.99                          |
| Heart rate (bpm)        | 501±14.5          | 476±9.6          | 481±10.3         | 460±10.9         | 0.88        | 0.66                          | 0.99                          |
| TAPSE (mm)              | 1.0±0.06          | 0.99±0.06        | 1.1±0.04         | 0.95±0.06        | 0.48        | 0.99                          | 0.99                          |
| RV s' (mm/s)            | 23.0±1.9          | 16.1±0.7         | 22.2±1.2         | 19.3±1.2         | 0.14        | 0.001                         | 0.82                          |
| RV e' (mm/s)            | -18.1±1.6         | -16.6±2.0        | -17.7±1.4        | -15.6±1.1        | 0.84        | 0.99                          | 0.99                          |
| RV E/A                  | 0.63±0.05         | 1.3±0.14         | 0.62±0.04        | 0.86±0.07        | 0.06        | 0.0008                        | 0.02                          |
| LV EF (%)               | 62±2.7            | 68±2.1           | 64±3.4           | 67±2.8           | 0.70        | 0.71                          | 0.99                          |
| LV E/A                  | 1.5±0.05          | 1.3±0.08         | 1.5±0.1          | 1.6±0.07         | 0.19        | 0.99                          | 0.99                          |
| Peak Velocity (mm/s)    | -720±28.9         | -1355±128.7      | -756±27.4        | -1493±164        | 0.67        | 0.0007                        | 0.0009                        |
| RV wall thickness (mm)  | 0.28±0.02         | 0.37±0.03        | 0.31±0.02        | 0.43±0.06        | 0.58        | 0.38                          | 0.14                          |

All data are presented as mean ± SEM; Two-way ANOVA for repeated measurements followed by Bonferroni post-hoc. Abbreviations: WT = wild type; KO = knockout; PAB= pulmonary artery banded; TAPSE = tricuspid annular plane systolic excursion; RV s' = doppler tissue imaging tricuspid lateral annular systolic velocity wave (s'); RV e' = lateral tricuspid annulus velocity during early filling (e'); E/A = early and late filling waves, indication of RV diastolic function; EF = ejection fraction.

**Table S6: List of Antibodies**

| <b>Antibody</b>                          | <b>Application(s)</b> | <b>Company (Catalog#)</b>            |
|------------------------------------------|-----------------------|--------------------------------------|
| EGFR (C74B9)                             | WB, ICC               | Cell Signaling Technology (#2646)    |
| Phospho-EGFR (Tyr1068) (1H12)            | WB, ICC               | Cell Signaling Technology (#2236)    |
| GFP (D5.1)                               | WB                    | Cell Signaling Technology (#2956)    |
| FGF Receptor 1 (D8E4)                    | WB                    | Cell Signaling Technology (#9740)    |
| Phospho-FGF Receptor (Tyr653/654) (55H2) | WB                    | Cell Signaling Technology (#3476)    |
| $\alpha 7$ nAChR                         | WB, ICC, IHC          | Alomone Labs (ANC-007)               |
| Tubulin (clone B-5-1-2)                  | WB                    | Sigma-Aldrich (T5168)                |
| Vimentin (V9)                            | WB, ICC, IHC          | Sigma-Aldrich (V6630)                |
| Myc (Clone 9E10)                         | WB                    | BioLegend (626802)                   |
| Vimentin (E-5)                           | WB, ICC, IHC          | Santa Cruz Biotechnology (sc-373717) |
| GAPDH (14C10)                            | WB                    | Cell Signaling Technology (#2118)    |

WB: Western Blot, ICC: Immunocytochemistry, IHC: Immunohistochemistry

**Table S7: Primers**

| Rat Primers      | Oligonucleotide Sequences (5'-3')                   | Human Primers    | Oligonucleotide Sequences (5'-3')                  |
|------------------|-----------------------------------------------------|------------------|----------------------------------------------------|
| Pro Collagen I   | F: GTGTTCAAGGTGGCAAAGGT<br>R: CTTCTCCAGCGGTACCTGAG  | Pro Collagen I   | F: TCCAAAGGAGAGAGCGGTAA<br>R: CAGATCCAGCTTCCCCATTA |
| $\alpha 7$ nAChR | F: TCCCTCCAGGCATATTCAAG<br>R: AGTTTGCACTGCTGCACATC  | $\alpha 7$ nAChR | F: TTCTCTCTCAGAGGGGACCA<br>R: GAGCGTTAGTGCTGGAAAGG |
| ChAT             | F: CGAGCCTTGTTGACATGAGA<br>R: TTCTGTAGGAGGCTGGGCTA  | ChAT             | F: TTTTGTGAGAGCCGTGACTG<br>R: CATCCTTCAGGAGCAGAAGC |
| ChT              | F: CAAGACCAAGGAGGAAGCAG<br>R: GGACATGACAGCAGCAGAAA  | ChT              | F: CACCATGTGCATCAGGAAAC<br>R: TTGCCCAACAGAATGGTACA |
| VACHT            | F: TGGTCATTCTGCAAGAGCAC<br>R: TCATGGAGAAGGGATTCCAG. | VACHT            | F: TCTCGAAGCCCAGCTATGTT<br>R: CTGGAAGCCAGAGGACTACG |
| GAPDH            | F: CGCTAACATCAAATGGGGTG<br>R: TTGCTGACAATCTTGAGGGAG | Actin            | F: TCCCTGGAAAAGAGCTACGA<br>R: TGCTGTTGTAGGTGGTCTCG |
| Mouse Primers    | Oligonucleotide Sequences (5'-3')                   |                  |                                                    |
| $\alpha 7$ nAChR | F: GCACCTCATGCATGGTACAC<br>R: TCCACTCACTGCAGATCACC  |                  |                                                    |
| Actin            | F: GCATGCAGAAGGAGATCACA<br>R: ACATCTGCTGGAAGGTGGAC  |                  |                                                    |

**Figure S1**

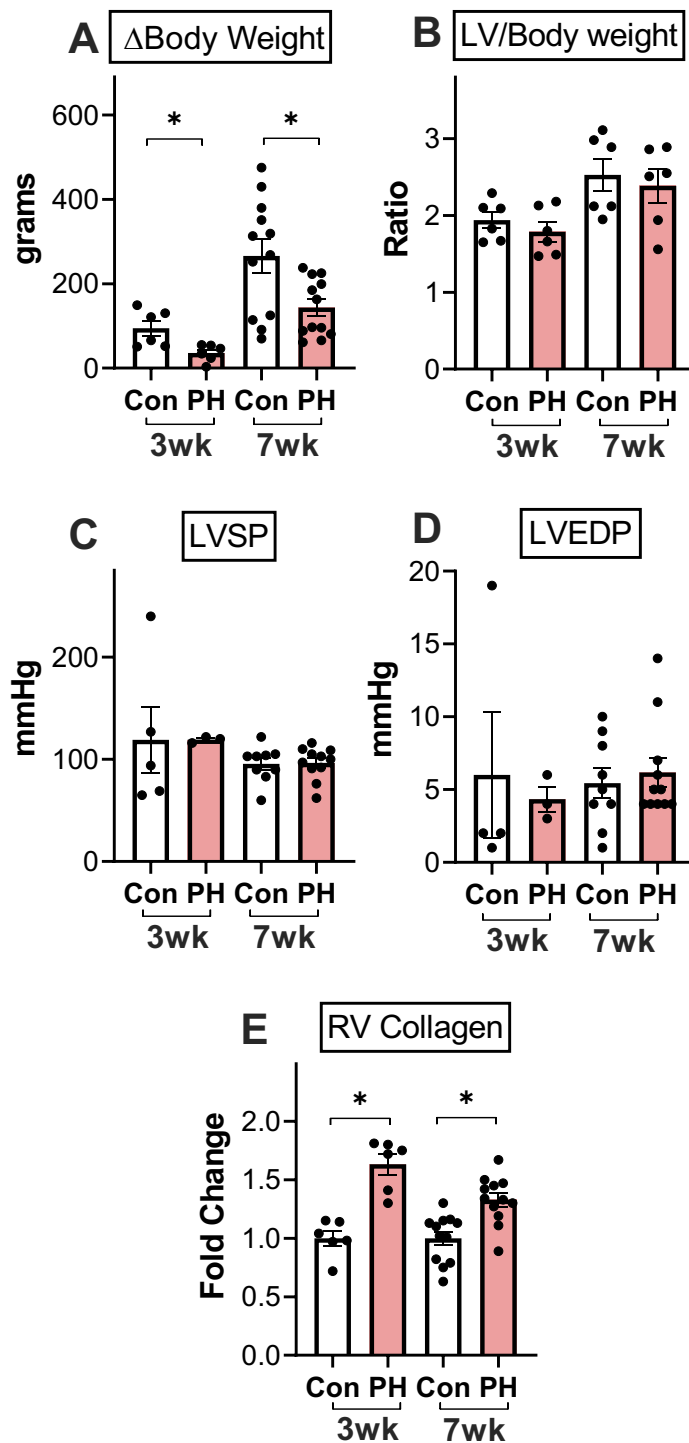

**Figure S1. Body weight and cardiac changes in the Sugén/Hypoxia rat PH model.**

Experimental design as in Figure 1. (A) Body weight change between Control and PH groups at 3 (n=6 each) and 7 wks (n=12 each) compared to baseline. (B) LV weight divided by body weight (n=6 each). (C) Invasively measured LV systolic and (D) end diastolic pressures (3 wks n=5/3; and 7 wks n=9/11). (E) RV collagen measured by Sircol assay (n=6-12). Mean  $\pm$  SEM. Two-tail *T*-tests were performed between control and PH at 3 and 7 wks; \**P* < 0.05. LV: left ventricle, LVSP: left ventricular systolic pressure, LVEDP: left ventricular end diastolic pressure.



**Figure S2**

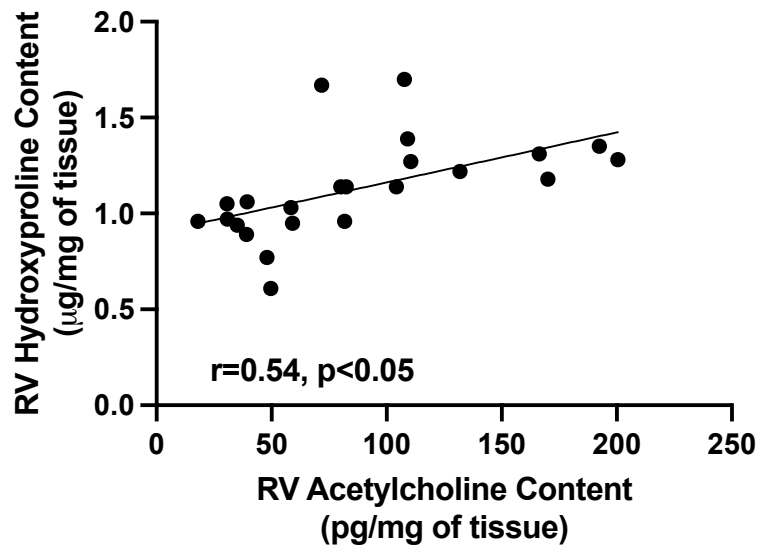

**Figure S2. Correlation between ACh and Collagen in the RV.**

Correlation between Acetylcholine content and RV collagen as assessed by hydroxyproline content in the cohort of control and PH rats. Both timepoints of 3 weeks and 7 weeks included.

**Figure S3**

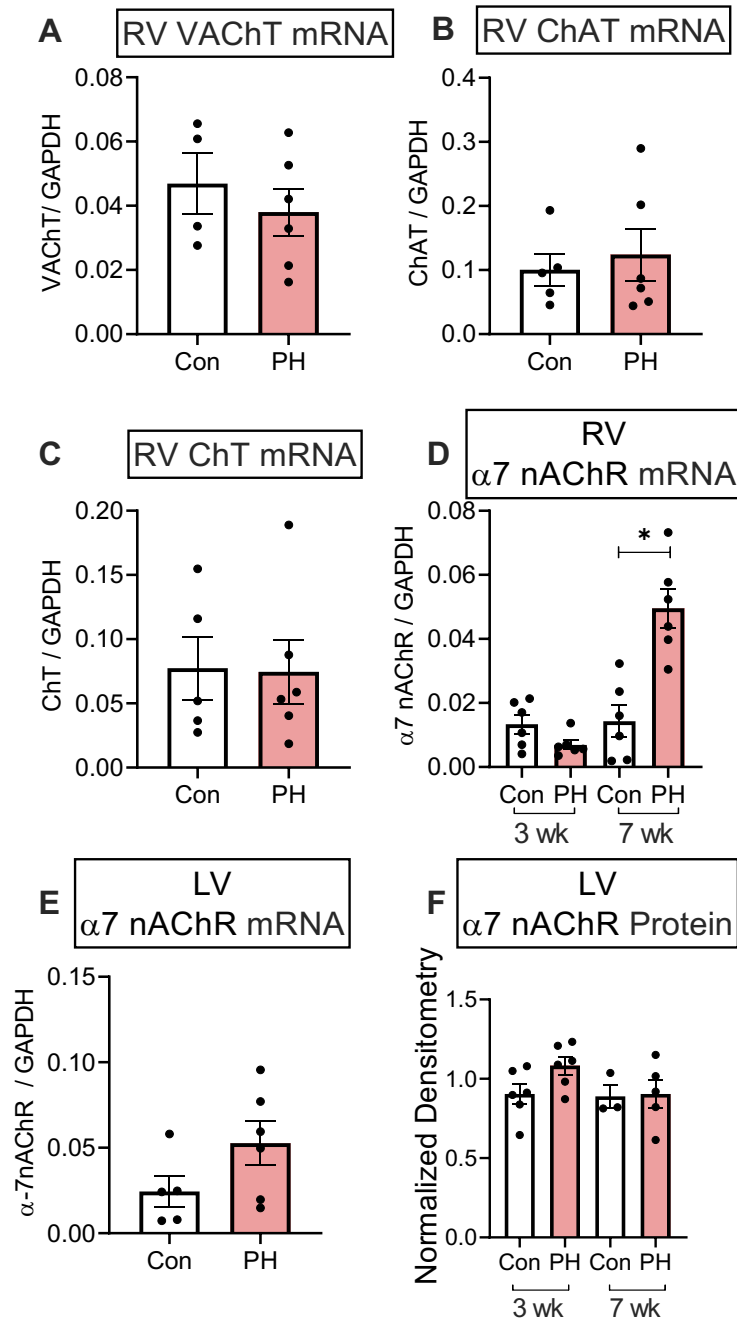

**Figure S3. mRNA and protein expression of genes related to ACh synthesis and  $\alpha 7$  nAChR in the RV and LV of the rat PH model**

Experimental design as in Figure 1A. mRNA expression of (A) vesicular acetylcholine transporter (n=4/6), (B) choline acetyltransferase (n=5/6) and (C) choline transporter (n=5/6) and in the RV from control and PH rats at 7 wks.  $\alpha 7$  nAChR mRNA expression in the (D) RV and (E) LV of control and PH rats. (F)  $\alpha 7$  nAChR protein expression in the LV of control and PH rats. Mean  $\pm$  SEM. Mann-Whitney U test was performed between control and PH; \* p<0.05. PH: pulmonary hypertension, VACHT: vesicular acetylcholine transporter, ChAT: choline acetyltransferase, ChT: choline transporter.

**Figure S4**

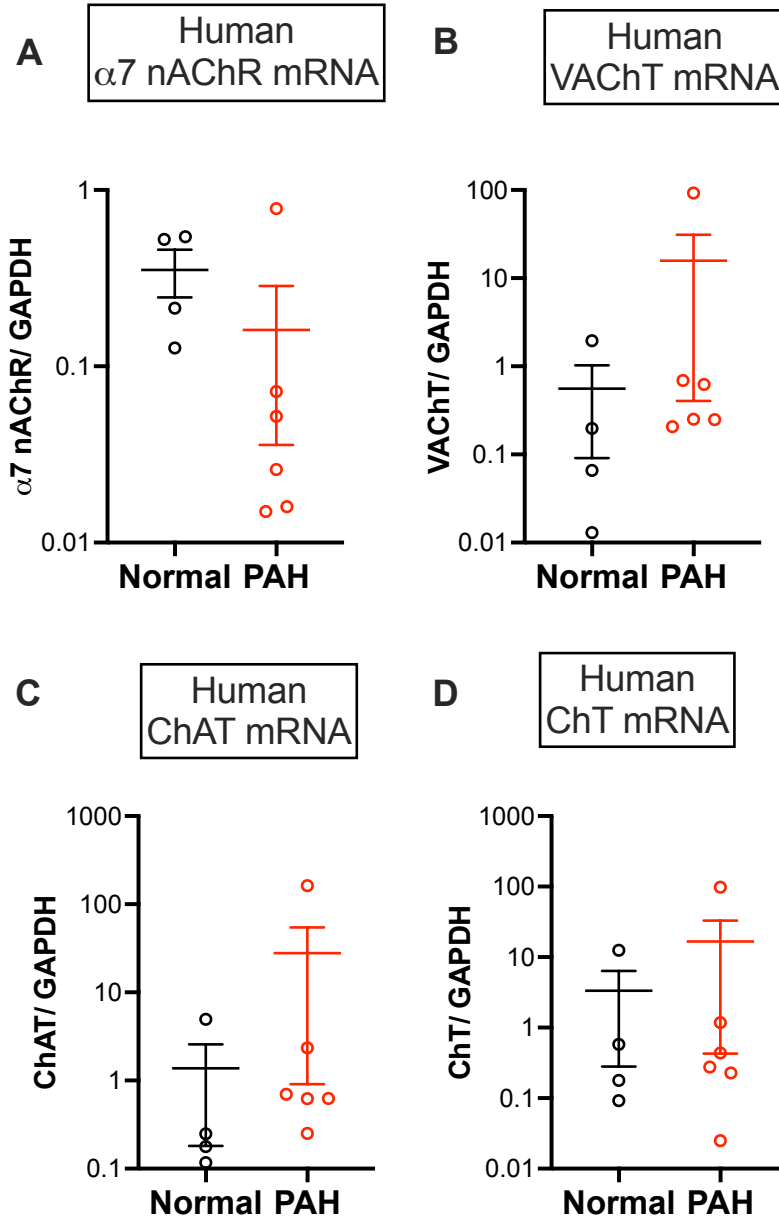

**Figure S4. mRNA expression of  $\alpha 7$ nAChR, ACh synthesis and production related genes in human PAH**

mRNA expression of (A)  $\alpha 7$ nAChR (B) vesicular acetylcholine transporter, (C) choline acetyltransferase expression and (D) choline transporter in the RV from control and PAH patients. Mean  $\pm$  SEM. N=4/5. Mann Whitney test was performed between control and PAH. PAH: pulmonary arterial hypertension, VACHT: vesicular acetylcholine transporter, ChAT: choline acetyltransferase, ChT: choline transporter.

**Figure S5**

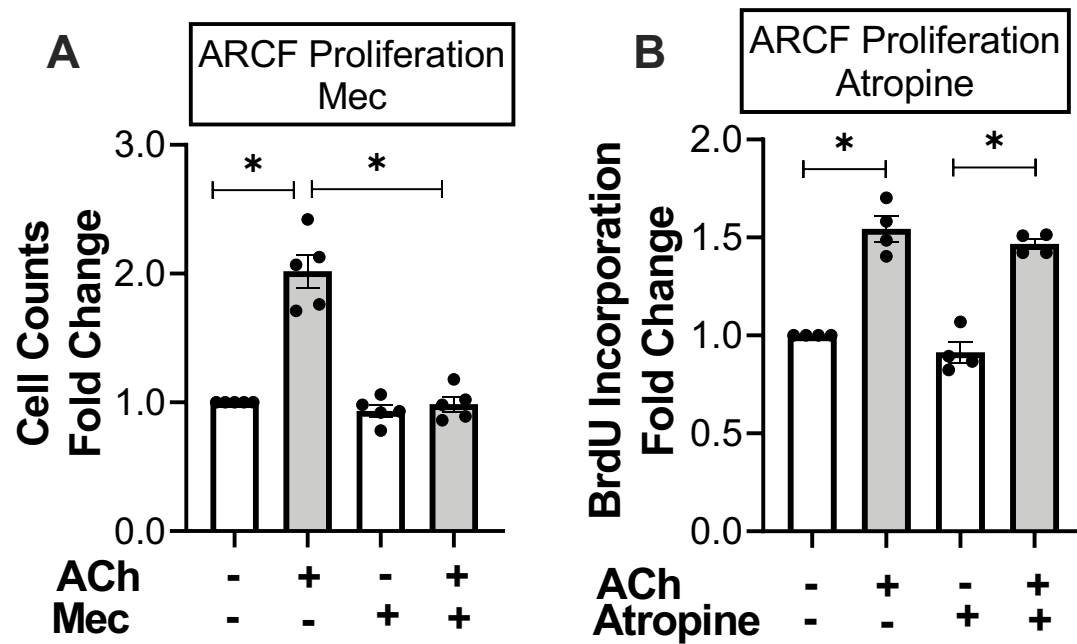

**Figure S5. Effect of mecamlamine and atropine on ACh-induced proliferation of adult rat cardiac fibroblasts.**

Experimental details similar to Figure 3C & 3E. Cell proliferation in adult rat CF upon ACh treatment in presence or absence of (A) mecamlamine (n=5 each) or (B) atropine (n=4 each). Mean ± SEM. Two-way ANOVA followed by Bonferroni comparison test. \* $P < 0.05$ . ARCF: adult rat CF, ACh: acetylcholine, Mec: mecamlamine, BrdU: Bromodeoxyuridine assay.

Figure S6

**A.**

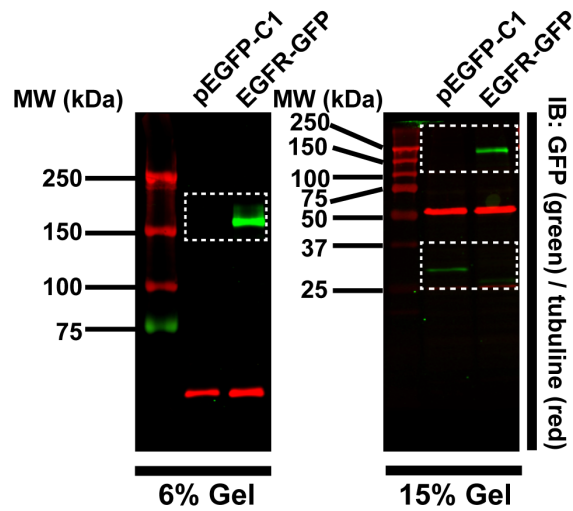

**B**

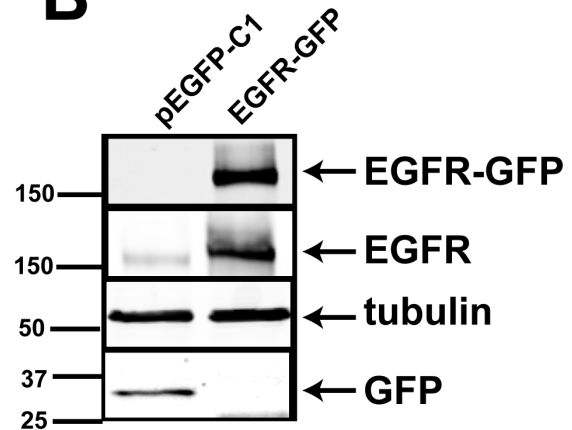

**Figure S6. Generation of HEK293T cells stably overexpressing EGFR**

(A) Representative fluorescent Western blots of EGFR-GFP detected by an infrared imaging system. Whole cell lysates were generated from HEK293T cells stably overexpressing EGFR-GFP and pEGFP-C1 vector (as a control). Immunoreactive bands corresponding to EGFR-GFP and GFP are shown in dotted squares. IB, immunoblot; MW, molecular weight. (B) Detection of EGFR in HEK293T cell lines stably overexpressing EGFR-GFP and pEGFP-C1 vector. Endogenous and exogenous EGFR were detected by antibodies against EGFR and GFP, respectively.

**Figure S7**

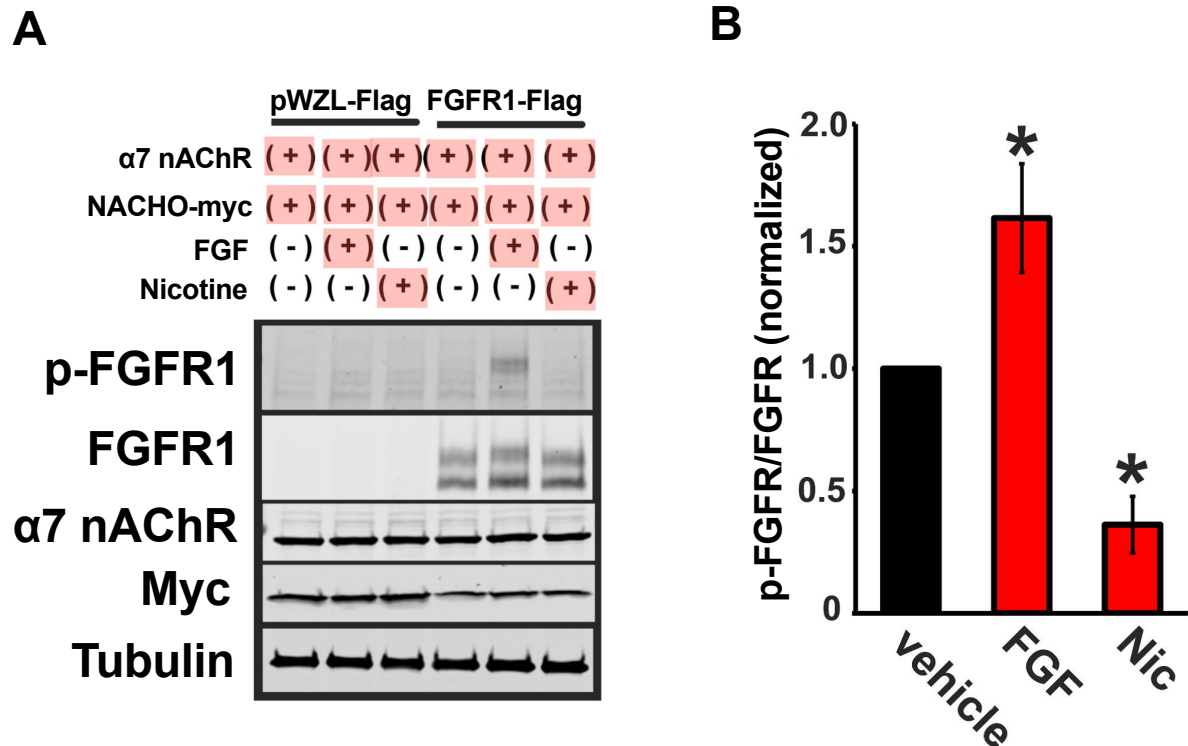

**Figure S7.  $\alpha 7$  AchR stimulation does not transactivates FGF receptors.**

(A) Representative Western blots of phospho-FGFR and FGFR in HEK293T cells stably overexpressing FGFR1-flag. Cells stably expressing pWZL-flag were used as control. Cells were transiently transfected with  $\alpha 7$  AchR and NACHO-Myc and stimulated with either with vehicle, 600 nM nicotine (Nic) and 1 ng/ml recombinant human FGF in the presence of 90  $\mu$ g/ml heparin for 10 min. (B) Summary data of A. N=3,  $p^* < 0.05$  compared to vehicle.

**Figure S8**

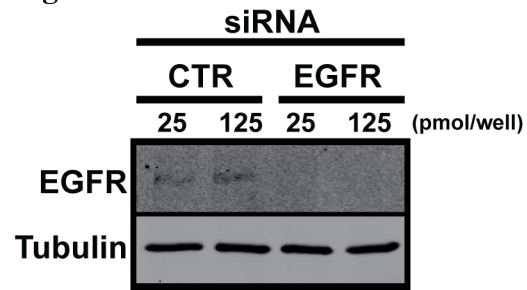

**Figure S8. siRNA mediated molecular suppression of EGFR.**

Adult rat cardiac fibroblasts were transfected with control or EGFR-specific siRNA at designated concentrations in 6-well plates, cultured for 72 hours, and harvested for protein lysates. Tubulin was used as loading control.

**Figure S9**

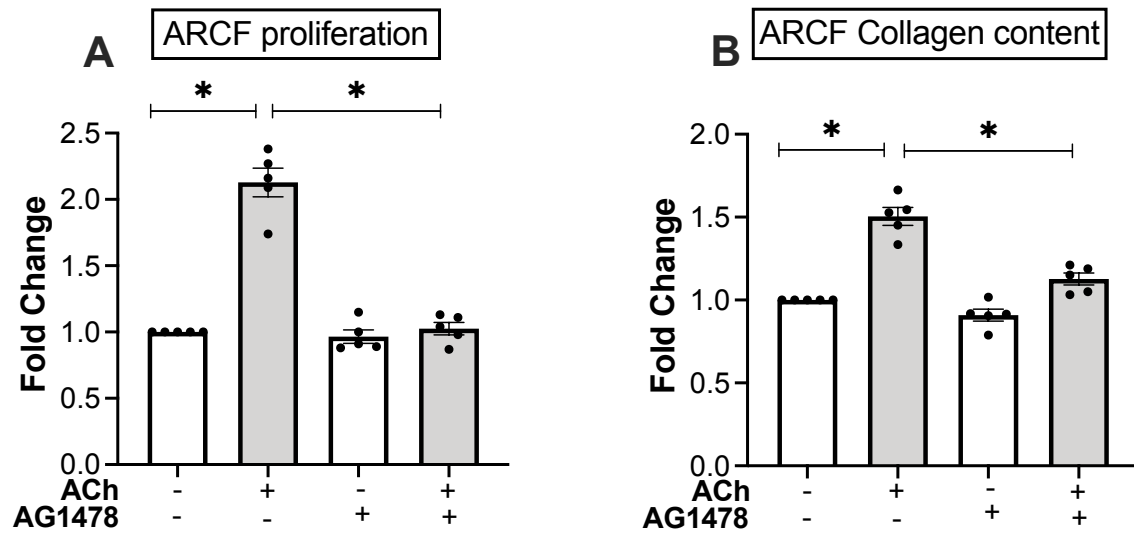

**Figure S9. Effect of EGFR inhibition on ACh-induced ARCF proliferation and collagen production**

Experimental design as in Figure 4I & J. (A) Cell counts (n=5 each) and (B) collagen content (n=5 each) of adult rat CF in response to ACh (10 nM) in the presence or absence of EGFR inhibitor AG1478 (50  $\mu$ M). Mean  $\pm$  SEM. Two-way ANOVA followed by Bonferroni comparison test. \* $P$  < 0.05. EGFR: epidermal growth factor receptor, AG1478: EGFR inhibitor, ARCF: adult rat CF, ACh: acetylcholine.



**Figure S10**

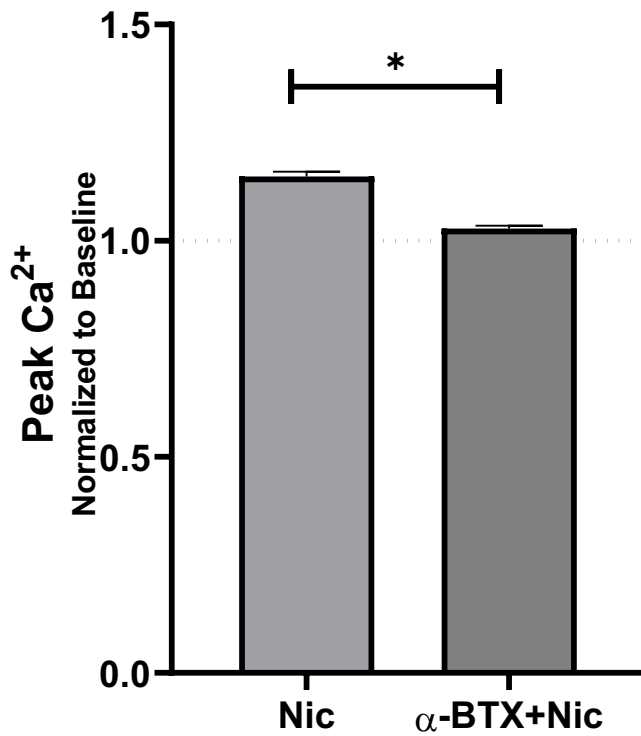

**Figure S10. Elevation of intracellular  $\text{Ca}^{2+}$  levels in response to  $\alpha 7\text{nAChR}$  stimulation in adult rat cardiac fibroblasts.**

Changes in  $[\text{Ca}^{2+}]_i$  in response to nicotine stimulation were assessed by  $\text{Ca}^{2+}$ -sensitive dye Fluo-3 in live ARCFs in the presence ( $n=34$ ) or absence ( $n=63$ ) of  $\alpha 7\text{nAChR}$ -specific blocker  $\alpha$ -BTX. Peak fluorescence value after stimulation was normalized by that before stimulation in each group. Two-tailed unpaired T-tests; \* $P < 0.05$ .  $\alpha$ -BTX: alpha-bungarotoxin, Nic: Nicotine.

**Figure S11**

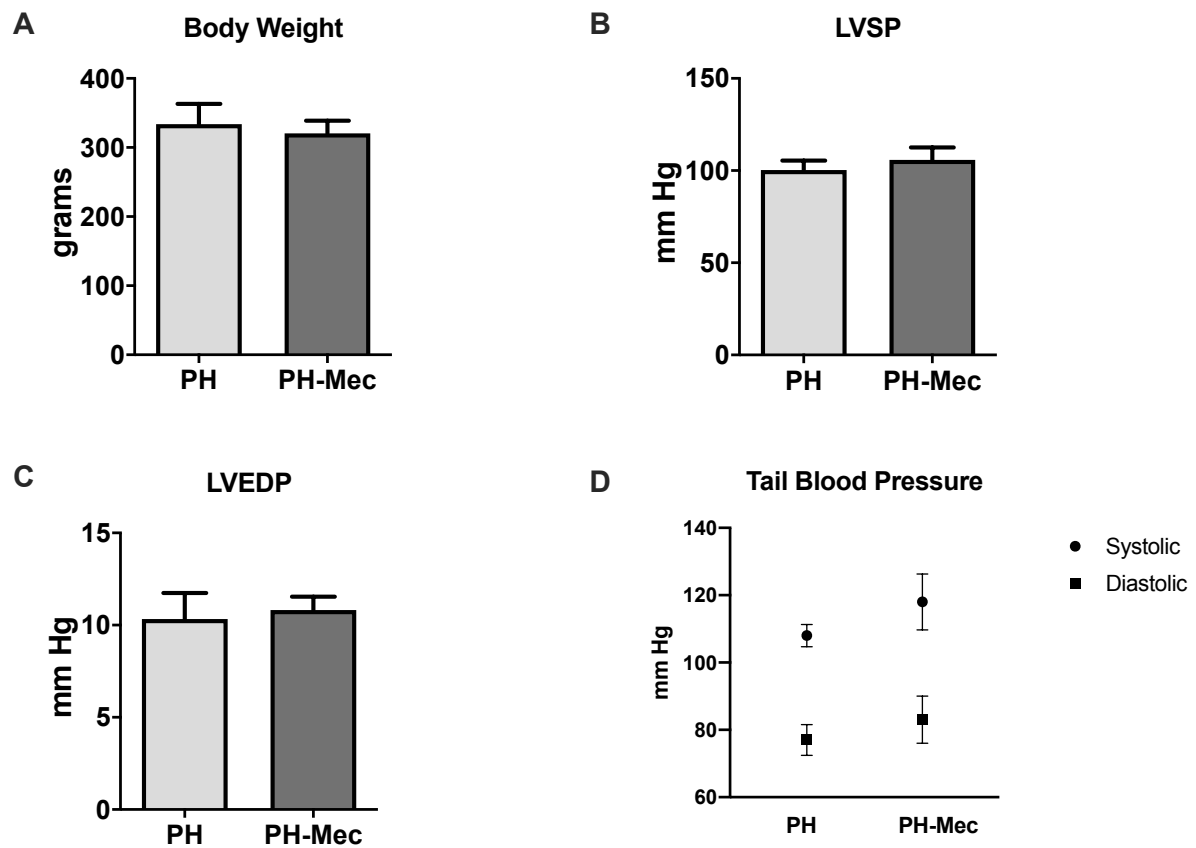

**Figure S11. Effect of mecamlamine treatment on body weight, LV hemodynamics, and blood pressure.**

Experimental design in Figure 5A. (A) Body weight, (B) LV systolic pressure, (C) LV end diastolic pressure and (D) systemic blood pressure measured using tail cuff in PH animals treated with either vehicle (PH-vehicle, n=9) or mecamlamine (PH-Mec, n=11). Mean  $\pm$  SEM. Two-tailed *T*-tests were performed between PH and PH-Mec. PH: pulmonary hypertension, Mec: mecamlamine.

**Figure S12**

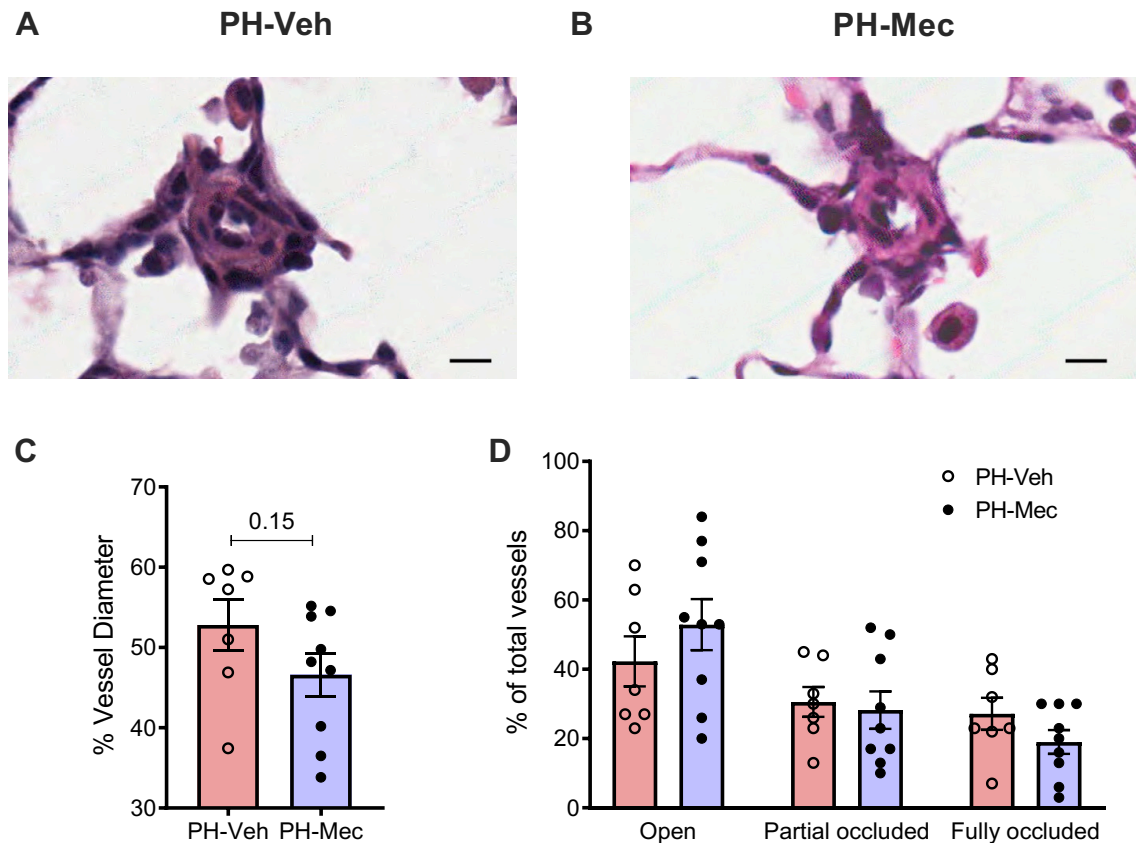

**Figure S12. Effect of mecamlamine treatment on pulmonary vascular remodeling in PH.** Experimental design in Figure 5A. Representative images of pulmonary arterioles (H&E, 40X magnification, scale bar 10  $\mu$ m) for (A) vehicle treated PH (n=7) and (B) Mec treated (n=9) PH rats. (C) Medial wall thickness measured over 30 randomly distributed vessels normalized to vessel diameter. (D) Percentage of open and partially or fully occluded vascular lesions. Mean  $\pm$  SEM. Two-tailed *T*-tests were performed between PH-Veh and PH-Mec. PH: pulmonary hypertension, Mec: mecamlamine.

**Figure S13**

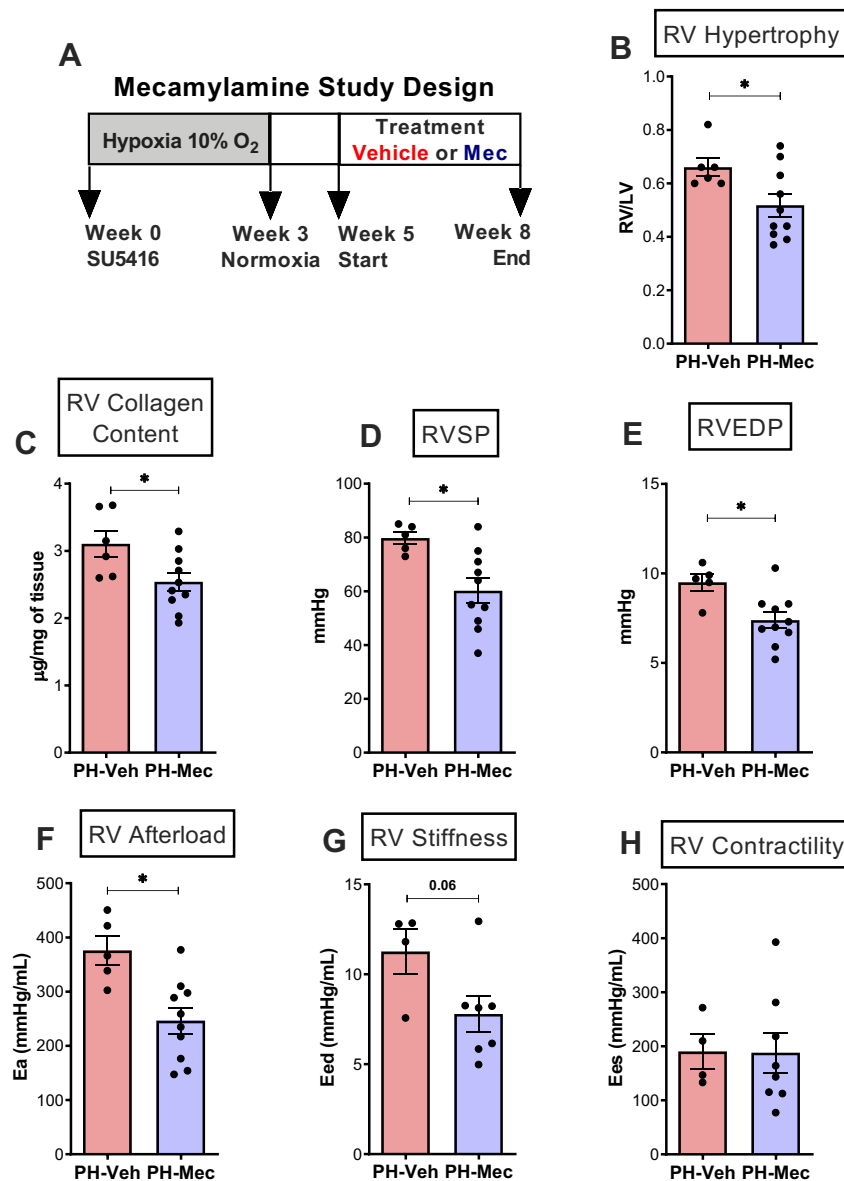

**Figure S13: Treatment with nAChR blocker, mecamylamine, starting at 5 wks improves RV function in experimental pulmonary hypertension.** (A) Schematic of experimental timeline: Rats were given a single bolus of SU5416, 20 mg/kg sq, and placed into hypobaric hypoxia chamber (10% FiO<sub>2</sub>). After three weeks, rats were moved to room air. At the beginning of week five, rats were divided randomly and given vehicle or mecamylamine (20 mg/kg/d, ip) for three weeks. At the end of week 8, animals underwent terminal physiological measurements and sacrificed. (B) RV hypertrophy as measured by RV/LV. (C) RV collagen content as measured by Sircol assay. (D/E) RVSP and RVEDP as measured by PV catheter. (F/G/H) RV afterload, stiffness, contractility as measured from PV loops. N = 6-10 for B-E, 4-8 for F-H, \*P < 0.05, unpaired t-test.

**Figure S14.  $\alpha 7$  nAChR mRNA expression in wild type and  $\alpha 7$  nAChR knockout mice.** mRNA expression confirming absence of  $\alpha 7$  nAChR in RV of knockout mice (n=8/12). Mean  $\pm$  SEM. Two-tailed *T*-test was performed between WT and KO mice; \**P* < 0.05. nAChR: nicotinic acetylcholine receptor. WT:  $\alpha 7$  nAChR wild type, KO:  $\alpha 7$  nAChR knockout

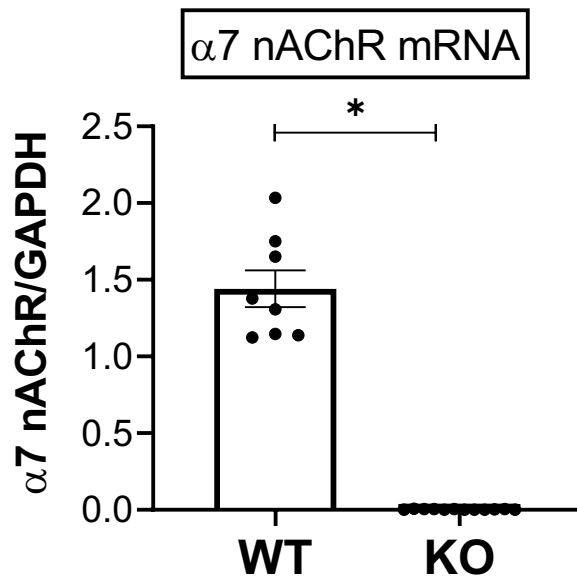

**Figure S15**

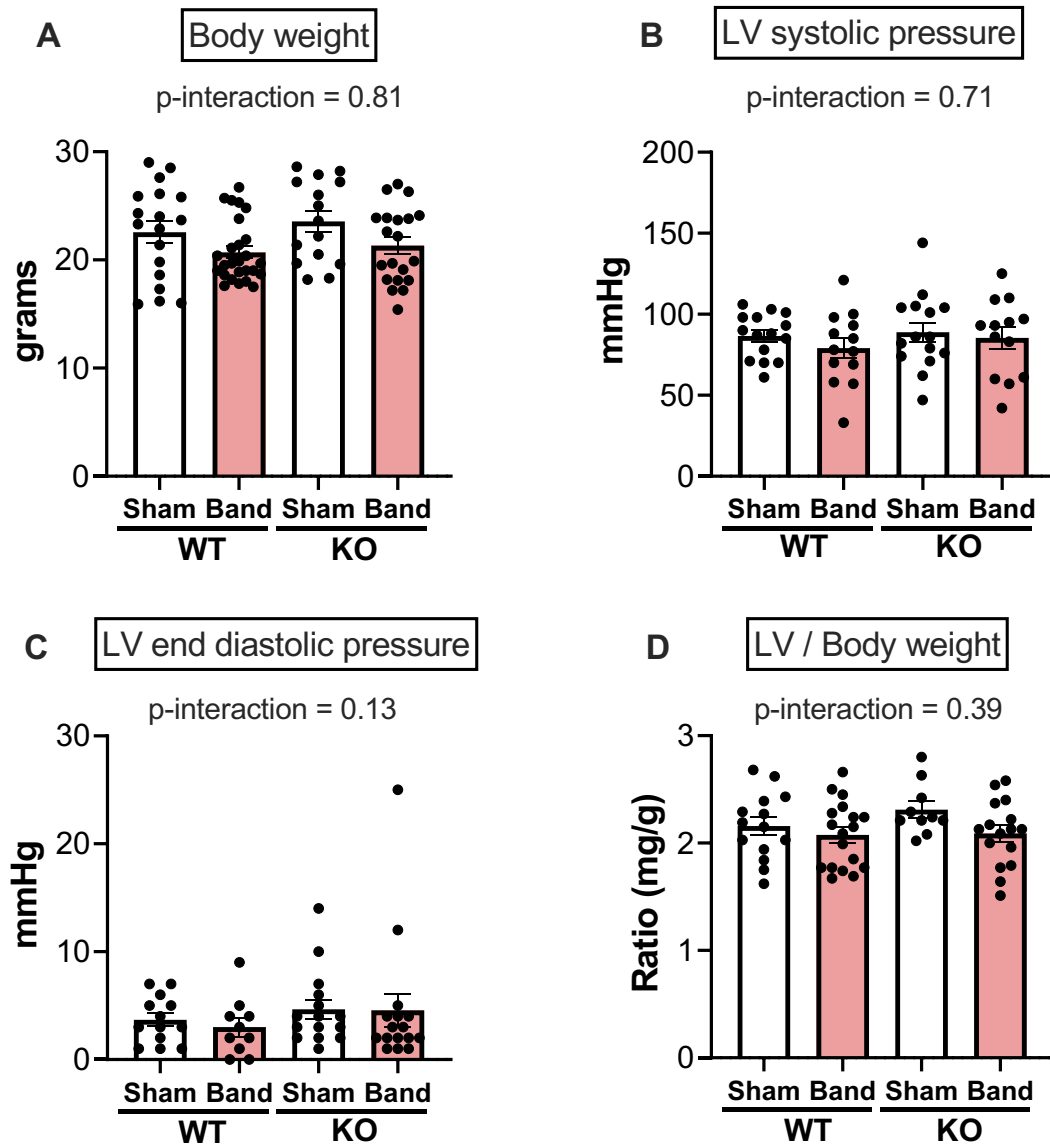

**Figure S15. Body weight and left ventricular changes in wild-type and  $\alpha 7$  nAChR knockout mice under RV pressure overload.**

Experimental design as in Figure 6A. (A) Body weights of sham and PA banded, wild type (n=18/26) and knock-out (n=15/20) mice. (B) LV systolic (n=15/13 each) and (C) end diastolic pressures (wild type n=13/10; knock-out n=15/16). (D) LV weight divided by body weight after banding in either wild type (n=14/18) or knockout mice (n=10/16). Mean  $\pm$  SEM. Two-way ANOVA followed by Bonferroni comparison test, not significant. WT:  $\alpha 7$  nAChR $^{+/+}$  wild type for alpha-7 nicotinic acetylcholine receptor, KO:  $\alpha 7$  nAChR $^{-/-}$  knockout for alpha-7 nicotinic acetylcholine receptor, LV: left ventricle.
